# Supplementary material for: Adolescent Tobacco Exposure in 31 Latin American Cities before and after the Framework Convention for Tobacco Control
Source: PubMed Central journal article supplement (PMC7601699; doi:10.3390/ijerph17207423), 2020-10-12

# Supplement File

## **Title: Adolescent tobacco exposure in 31 Latin American cities before and after the Framework Convention for Tobacco Control**

### **Authors:**

**Francisco-Javier Prado-Galbarro, Amy H. Auchincloss, Carolina Pérez-Ferrer, Sharon Sánchez-Franco, Tonatiuh Barrientos-Gutierrez\***

Correspondence: Dr. Tonatiuh Barrientos-Gutierrez, Center for Population Health Research National Institute of Public Health Av. Universidad 655, Col. Sta. Ma. Ahuacatitlan. Cuernavaca, Morelos, Mexico; tbarrientos@insp.mx

### **Table of Contents**

Supplement Table S1. Global Youth Tobacco Survey items and coding scheme, grouped into domains based on the Framework Convention on Tobacco Control (WHO-FCTC).

Supplement Table S2. Age and sex distribution of participants in the Global Youth Tobacco Surveys: 2000-2011.

Supplement Table S3. Survey summary statistics (proportions [95% confidence intervals] and means (and confidence intervals) for early (2000-2005) and later (2006-2014) periods, by country and city. Data from the Global Youth Tobacco Survey (GYTS) grouped into domains based on the Framework Convention on Tobacco Control (WHO-FCTC).

Supplement Figure S1. Forest plot ENFORCE-MEDIA AND ADVERTISING. Means of exposure to tobacco media and advertising and weighted mean difference of later:earlier period (WMD, with 95% confidence intervals), by country and city (sorted by WMD).

Supplement Figure S2. Forest plot ENFORCE-FREE CIGARETTE. Prevalence of offered free cigarette and ratio of later:earlier period prevalence (PR, with 95% confidence intervals), by country and city (sorted by PR).

**Supplement Table S1.** Global Youth Tobacco Survey survey items and coding scheme, grouped into domains based on the Framework Convention on Tobacco Control (WHO-FCTC).

| Domain, scale components, and survey questions                                                                                                                                                                                                                                                                                               | Response options                                                                                       | Recoding*                                                                                           | Estimator used In analysis *                                                                                                                    | Direction                                                                             |
|----------------------------------------------------------------------------------------------------------------------------------------------------------------------------------------------------------------------------------------------------------------------------------------------------------------------------------------------|--------------------------------------------------------------------------------------------------------|-----------------------------------------------------------------------------------------------------|-------------------------------------------------------------------------------------------------------------------------------------------------|---------------------------------------------------------------------------------------|
| <b>MONITOR</b>                                                                                                                                                                                                                                                                                                                               |                                                                                                        |                                                                                                     |                                                                                                                                                 |                                                                                       |
| <b>Tobacco use</b>                                                                                                                                                                                                                                                                                                                           |                                                                                                        |                                                                                                     |                                                                                                                                                 |                                                                                       |
| During the past 30 days (one month), on how many days did you smoke cigarettes?                                                                                                                                                                                                                                                              | 0 days vs. > 0 days (response options 1-2 days, 3-5 days, 6-9 days, 10-19 days, 20-29 days, =>30 days) | Yes' is >0 days<br>'No' is zero days.                                                               | <b>Percentage</b> of students who smoke cigarettes or used other tobacco products (answered 'Yes' to any of the 3 questions within this domain) | <b>Lower</b> is more favorable                                                        |
| During the past 30 days (one month), on the days you smoked, how many cigarettes did you usually smoke?                                                                                                                                                                                                                                      | 0 days vs. > 0 days (response options <1 per day, 1 per day, 2-5 per day, 11-20 per day, >20 per day)  | Yes' is >0 days<br>'No' is zero days.                                                               |                                                                                                                                                 |                                                                                       |
| During the past 30 days (one month), have you ever used any form of tobacco products other than cigarettes (e.g. chewing tobacco, snuff, dip, cigars, cigarillos, little cigars, pipe)?                                                                                                                                                      | Yes; No                                                                                                | Yes' is >0 days<br>'No' is zero days.                                                               |                                                                                                                                                 |                                                                                       |
| <b>PROTECT</b>                                                                                                                                                                                                                                                                                                                               |                                                                                                        |                                                                                                     |                                                                                                                                                 |                                                                                       |
| <b>Smoke at home</b>                                                                                                                                                                                                                                                                                                                         |                                                                                                        |                                                                                                     |                                                                                                                                                 |                                                                                       |
| During the past 7 days, on how many days have people smoked in your home, in your presence?                                                                                                                                                                                                                                                  | 0; 1 to 2; 3 to 4; 5 to 6; 7                                                                           | Yes' is >0 days<br>'No' is zero days.                                                               | <b>Percentage</b> of students exposed to smokers in the home                                                                                    | <b>Lower</b> is more favorable                                                        |
| <b>Smoke in other places</b>                                                                                                                                                                                                                                                                                                                 |                                                                                                        |                                                                                                     |                                                                                                                                                 |                                                                                       |
| During the past 7 days, on how many days have people smoked in your presence, in places other than in your home?                                                                                                                                                                                                                             | 0; 1 to 2; 3 to 4; 5 to 6; 7                                                                           | Yes' is >0 days<br>'No' is zero days.                                                               | <b>Percentage</b> of students who are exposed to smoke outside the home                                                                         | <b>Lower</b> is more favorable                                                        |
| <b>WARN</b>                                                                                                                                                                                                                                                                                                                                  |                                                                                                        |                                                                                                     |                                                                                                                                                 |                                                                                       |
| <b>Anti-tobacco education in school</b>                                                                                                                                                                                                                                                                                                      |                                                                                                        |                                                                                                     |                                                                                                                                                 |                                                                                       |
| During this school year, were you taught in any of your classes about the dangers of smoking?                                                                                                                                                                                                                                                | Yes; No; Not sure                                                                                      | Yes coded as 1 . No coded as 0. 'Not sure' coded as missing                                         | <b>Average</b> of the sum of the three items at city level                                                                                      | <b>Higher</b> is more favorable (more exposure to anti-tobacco information at school) |
| During this school year, did you discuss in any of your classes the reasons why people your age smoke?                                                                                                                                                                                                                                       | Yes; No; Not sure                                                                                      | Yes coded as 1 . No coded as 0. 'Not sure' coded as missing                                         |                                                                                                                                                 |                                                                                       |
| During this school year, were you taught in any of your classes about the effects of smoking, like it makes your teeth yellow, causes wrinkles, or makes you smell bad?                                                                                                                                                                      | Yes; No; Not sure                                                                                      | Yes coded as 1. No coded as 0. 'Not sure' coded as missing                                          |                                                                                                                                                 |                                                                                       |
| <b>ENFORCE</b>                                                                                                                                                                                                                                                                                                                               |                                                                                                        |                                                                                                     |                                                                                                                                                 |                                                                                       |
| <b>Retailer refuses to sell cigarette</b>                                                                                                                                                                                                                                                                                                    |                                                                                                        |                                                                                                     |                                                                                                                                                 |                                                                                       |
| During the past 30 days (one month), did anyone ever refuse to sell you cigarettes because of your age?                                                                                                                                                                                                                                      | I did not try to buy cigarettes during the past 30 days (one month); Yes; No                           | Yes; No                                                                                             | <b>Percentage</b> of students who were unable to purchase a cigarette, among those who reported trying to buy a cigarette                       | <b>Higher</b> is more favorable (unable to purchase tobacco)                          |
| <b>Media and advertising</b>                                                                                                                                                                                                                                                                                                                 |                                                                                                        |                                                                                                     |                                                                                                                                                 |                                                                                       |
| Do you have something (t-shirt, pen, backpack, etc.) with a cigarette brand logo on it?                                                                                                                                                                                                                                                      | Yes; No                                                                                                | Yes coded as 1 . No coded as 0                                                                      | <b>Average</b> of the sum of the three items at city level                                                                                      | <b>Lower</b> is more favorable (less exposure to tobacco media and advertising)       |
| During the past 30 days, did you see or hear any anti-tobacco media messages on television, radio, internet, billboards, posters, newspapers, magazines, or movies? / During the past 30 days (one month), how many anti-smoking media messages (e.g., television, radio, billboards, posters, newspapers, magazines, movies) have you seen? | Yes; No / A lot; Sometimes; Never                                                                      | Yes and Sometimes coded as 1 'Yes'; No / A lot and Sometimes coded as 0 'No'                        |                                                                                                                                                 |                                                                                       |
| When you watch TV, videos, or movies, how often do you see actors smoking?                                                                                                                                                                                                                                                                   | I never watch TV, videos, or movies; A lot; Sometimes; Never                                           | A lot and Sometimes coded as 1 'Yes'; I never watch TV, videos, or movies and Never coded as 0 'No' |                                                                                                                                                 |                                                                                       |
| <b>Offered free cigarette</b>                                                                                                                                                                                                                                                                                                                |                                                                                                        |                                                                                                     |                                                                                                                                                 |                                                                                       |
| Has a cigarette+H2O representative ever offered you a free cigarette?                                                                                                                                                                                                                                                                        | Yes; No                                                                                                |                                                                                                     | <b>Percentage</b> of students who were offered a free cigarette.                                                                                | <b>Lower</b> is more favorable                                                        |

\* All item non-response (asked question but refused to reply) were coded as missing. If a participant was missing all items within a domain, then they were coded as missing.

**Supplementary Table S2.** Age and sex distribution of participants in the Global Youth Tobacco Surveys: 2000-2011.

|              | Period   | N         | Sex, % |        | Age group (years), % |      |      |      |      |      |      |
|--------------|----------|-----------|--------|--------|----------------------|------|------|------|------|------|------|
|              |          |           | Male   | Female | <11                  | 12   | 13   | 14   | 15   | 16   | >17  |
| <b>Total</b> | Period 1 | 3,667,833 | 48.9   | 51.1   | 3.5                  | 15   | 23.7 | 26   | 17.5 | 8.9  | 5.3  |
|              | Period 2 | 3,340,939 | 49.4   | 50.6   | 3.5                  | 11.5 | 23.9 | 24.9 | 19.9 | 10.6 | 5.7  |
| Argentina    | Period 1 | 138,550   | 50.2   | 49.8   | 1                    | 1.1  | 19.4 | 26.2 | 30.3 | 15.5 | 6.5  |
|              | Period 2 | 125,619   | 51.3   | 48.7   | 1.7                  | 1.2  | 15.3 | 25.7 | 30   | 17.5 | 8.5  |
| Brazil       | Period 1 | 330,397   | 42.5   | 57.5   | 0                    | 1.6  | 12.1 | 23.5 | 23.2 | 16.7 | 22.9 |
|              | Period 2 | 235,118   | 49     | 51.0   | 0                    | 4.3  | 20.6 | 25.1 | 24.5 | 14.3 | 11.2 |
| Chile        | Period 1 | 604,370   | 49.7   | 50.3   | 2.8                  | 16.7 | 29.6 | 28.9 | 17.1 | 3.4  | 1.5  |
|              | Period 2 | 437,254   | 51.6   | 48.4   | 1.3                  | 13.6 | 22.6 | 22.7 | 22.6 | 13   | 4.2  |
| Colombia     | Period 1 | 203,177   | 50.6   | 49.4   | 12.7                 | 22   | 21   | 20.9 | 13.9 | 6.7  | 2.9  |
|              | Period 2 | 475,205   | 46.7   | 53.3   | 2.7                  | 11.6 | 19   | 23.7 | 22.3 | 12.8 | 8    |
| Mexico       | Period 1 | 1,197,922 | 49.6   | 50.4   | 4.3                  | 21.7 | 29.7 | 29.2 | 11.7 | 2.6  | 0.7  |
|              | Period 2 | 1,256,846 | 49.1   | 50.9   | 5.8                  | 11.8 | 30.3 | 29   | 17.6 | 4.1  | 1.4  |
| Peru         | Period 1 | 1,193,417 | 49.3   | 50.7   | 3                    | 11.9 | 18.9 | 23   | 20.9 | 15.2 | 7.1  |
|              | Period 2 | 810,897   | 50.1   | 49.9   | 3.1                  | 13.4 | 19.9 | 20.2 | 17.7 | 16   | 9.7  |

**Supplementary Table S3.** Survey summary statistics (proportions [95% confidence intervals] and means [standard errors]) for early (2000-2005) and later (2006-2014) periods, by country and city. Data from the Global Youth Tobacco Survey (GYTS) grouped into domains based on the Framework Convention on Tobacco Control (WHO-FCTC).

| Country, City    | N of students | Survey Years Utilized                             | 2000-2005        |                  |                       |                                  |                                    |                     |                          | 2006-2011 (2011 was last available year) |                  |                       |                                  |                                    |                     |                          |            |            |  |  |
|------------------|---------------|---------------------------------------------------|------------------|------------------|-----------------------|----------------------------------|------------------------------------|---------------------|--------------------------|------------------------------------------|------------------|-----------------------|----------------------------------|------------------------------------|---------------------|--------------------------|------------|------------|--|--|
|                  |               |                                                   | MONITOR          |                  | PROTECT               |                                  | WARN                               |                     | ENFORCE                  |                                          |                  | MONITOR               |                                  | PROTECT                            |                     | WARN                     |            | ENFORCE    |  |  |
|                  |               |                                                   | Tobacco use      | Smoke at home    | Smoke in other places | Anti-tobacco education in school | Retailer refuses to sell cigarette | Media & advertising | Offered a free cigarette | Tobacco use                              | Smoke at home    | Smoke in other places | Anti-tobacco education in school | Retailer refuses to sell cigarette | Media & advertising | Offered a free cigarette |            |            |  |  |
|                  |               |                                                   | % (CI 95%)       | % (CI 95%)       | % (CI 95%)            | % (CI 95%)                       | % (CI 95%)                         | % (CI 95%)          | % (CI 95%)               | % (CI 95%)                               | % (CI 95%)       | % (CI 95%)            | % (CI 95%)                       | % (CI 95%)                         | % (CI 95%)          | % (CI 95%)               | % (CI 95%) | % (CI 95%) |  |  |
| Total            | 119915        | This row is the weighted average across countries | 26.8 (25.7-28.0) | 44.7 (43.6-45.8) | 56.9 (55.7-58.0)      | 0.49 (0.47-0.51)                 | 31.6 (29.8-33.5)                   | 0.64 (0.63-0.64)    | 11.7 (11.1-12.4)         | 25.7 (24.3-27.2)                         | 34.4 (33.0-35.8) | 54.9 (53.6-56.2)      | 0.54 (0.52-0.55)                 | 39.2 (37.2-41.2)                   | 0.59 (0.58-0.60)    | 12.3 (11.4-13.2)         |            |            |  |  |
| <b>ARGENTINA</b> |               |                                                   |                  |                  |                       |                                  |                                    |                     |                          |                                          |                  |                       |                                  |                                    |                     |                          |            |            |  |  |
| Total            | 3824          |                                                   |                  |                  |                       |                                  |                                    |                     |                          |                                          |                  |                       |                                  |                                    |                     |                          |            |            |  |  |
| Federal Capital  | 3824          | 2000, 2007                                        | 33.3 (29.9-36.8) | 69.6 (67.0-72.1) | 87.6 (85.4-89.6)      | 0.33 (0.26-0.39)                 | 11.1 (8.2-14.9)                    | 0.59 (0.58-0.60)    | 10.4 (8.9-12.3)          | 28.8 (24-34.1)                           | 48.5 (44.3-52.7) | 69.3 (65.3-72.9)      | 0.43 (0.38-0.48)                 | 19.5 (14-26.5)                     | 0.55 (0.54-0.56)    | 9.3 (7.3-11.9)           |            |            |  |  |
| <b>BRAZIL</b>    |               |                                                   |                  |                  |                       |                                  |                                    |                     |                          |                                          |                  |                       |                                  |                                    |                     |                          |            |            |  |  |
| Total            | 10250         |                                                   | 24.1 (21.2-27.4) | 41.9 (40.0-43.8) | 59.9 (57.6-62.2)      | 0.60 (0.55-0.64)                 | 12.6 (10.1-15.6)                   | 0.64 (0.63-0.65)    | 11.3 (9.5-13.3)          | 20.3 (18.3-22.4)                         | 36.3 (34.4-38.3) | 52.6 (50.8-54.4)      | 0.51 (0.47-0.55)                 | 23.6 (20.9-26.5)                   | 0.62 (0.61-0.63)    | 8.9 (8.0-9.9)            |            |            |  |  |
| Curitiba         | 4385          | 2002, 2006                                        | 18.5 (14.6-23.1) | 41.2 (37.4-45.1) | 61.2 (56.9-65.4)      | 0.61 (0.51-0.72)                 | 16 (11-22.7)                       | 0.66 (0.65-0.67)    | 8.4 (6.9-10.2)           | 20.7 (18.7-22.9)                         | 41.3 (39.0-43.6) | 56 (53.7-58.3)        | 0.51 (0.45-0.58)                 | 28.9 (25.9-32.1)                   | 0.63 (0.62-0.64)    | 9.4 (7.5-11.7)           |            |            |  |  |
| Sao Luis         | 3143          | 2004, 2006                                        | 22 (18.2-26.4)   | 31.4 (28.6-34.5) | 49.2 (46-52.3)        | 0.55 (0.50-0.60)                 | 18.3 (14-23.5)                     | 0.63 (0.62-0.64)    | 8.4 (7.4-9.5)            | 20.4 (17-24.3)                           | 27.1 (24.8-29.6) | 44.6 (41.7-47.5)      | 0.56 (0.49-0.62)                 | 25.6 (21-31.8)                     | 0.61 (0.61-0.62)    | 8.9 (7.2-11)             |            |            |  |  |
| Fortaleza        | 2722          | 2002, 2006                                        | 27.8 (22.7-33.5) | 46.6 (43.6-49.5) | 63.8 (60-67.5)        | 0.61 (0.55-0.67)                 | 9.5 (6.5-13.6)                     | 0.63 (0.62-0.65)    | 13.9 (10.8-17.7)         | 19.9 (16.5-23.9)                         | 37.5 (34.2-40.9) | 54.2 (51.4-57)        | 0.49 (0.42-0.56)                 | 19.1 (15-24.1)                     | 0.62 (0.61-0.63)    | 8.6 (7.4-9.9)            |            |            |  |  |
| <b>CHILE</b>     |               |                                                   |                  |                  |                       |                                  |                                    |                     |                          |                                          |                  |                       |                                  |                                    |                     |                          |            |            |  |  |
| Total            | 8303          |                                                   | 39.5 (35.9-43.2) | 61.3 (57.9-64.5) | 71.9 (68.6-75.0)      | 0.30 (0.26-0.35)                 | 16.1 (13.7-18.9)                   | 0.61 (0.61-0.62)    | 8.9 (7.8-10.2)           | 36.9 (34-39.9)                           | 52.3 (49.5-55.1) | 68.2 (65.9-70.5)      | 0.47 (0.43-0.51)                 | 46.8 (43.7-49.9)                   | 0.60 (0.59-0.61)    | 8.9 (7.9-10.1)           |            |            |  |  |
| Santiago         | 8303          | 2000, 2008                                        | 39.5 (35.9-43.2) | 61.3 (57.9-64.5) | 71.9 (68.6-75.0)      | 0.30 (0.26-0.35)                 | 16.1 (13.7-18.9)                   | 0.61 (0.61-0.62)    | 8.9 (7.8-10.2)           | 36.9 (34-39.9)                           | 52.3 (49.5-55.1) | 68.2 (65.9-70.5)      | 0.47 (0.43-0.51)                 | 46.8 (43.7-49.9)                   | 0.60 (0.59-0.61)    | 8.9 (7.9-10.1)           |            |            |  |  |
| <b>COLOMBIA</b>  |               |                                                   |                  |                  |                       |                                  |                                    |                     |                          |                                          |                  |                       |                                  |                                    |                     |                          |            |            |  |  |
| Total            | 5520          |                                                   | 30.6 (27.9-33.5) | 41.3 (39.4-43.1) | 56.3 (54.5-58)        | 0.38 (0.33-0.42)                 | 30.6 (26.6-34.9)                   | 0.65 (0.64-0.65)    | 22.2 (20.4-24)           | 30.7 (27.4-34.1)                         | 26.7 (24.4-29.1) | 55.7 (52.4-58.9)      | 0.36 (0.31-0.4)                  | 45.2 (39.7-50.8)                   | 0.61 (0.6-0.62)     | 21.5 (19.2-24.1)         |            |            |  |  |
| Bogota           | 5520          | 2001, 2007                                        | 30.6 (27.9-33.5) | 41.3 (39.4-43.1) | 56.3 (54.5-58)        | 0.38 (0.33-0.42)                 | 30.6 (26.6-34.9)                   | 0.65 (0.64-0.65)    | 22.2 (20.4-24)           | 30.7 (27.4-34.1)                         | 26.7 (24.4-29.1) | 55.7 (52.4-58.9)      | 0.36 (0.31-0.4)                  | 45.2 (39.7-50.8)                   | 0.61 (0.6-0.62)     | 21.5 (19.2-24.1)         |            |            |  |  |
| <b>MEXICO</b>    |               |                                                   |                  |                  |                       |                                  |                                    |                     |                          |                                          |                  |                       |                                  |                                    |                     |                          |            |            |  |  |
| Total            | 77826         |                                                   | 24.0 (22.5-25.6) | 44.4 (43.2-45.5) | 54.1 (53.0-55.3)      | 0.54 (0.53-0.56)                 | 46.0 (43.3-48.8)                   | 0.64 (0.64-0.65)    | 11.7 (10.6-12.8)         | 21.7 (20.1-23.3)                         | 37.0 (35.0-39.1) | 51.3 (49.4-53.3)      | 0.66 (0.64-0.68)                 | 48.5 (45.9-51.1)                   | 0.63 (0.62-0.64)    | 12.2 (10.8-13.7)         |            |            |  |  |
| Toluca           | 4098          | 2005, 2011                                        | 32.0 (28.4-35.7) | 38.6 (35.7-41.7) | 50.1 (47.3-52.9)      | 0.59 (0.56-0.62)                 | 48 (43.6-52.5)                     | 0.63 (0.62-0.64)    | 14.2 (12.6-16.1)         | 23.6 (21.6-25.6)                         | 30.4 (28.2-32.8) | 48.6 (45.1-52.1)      | 0.70 (0.66-0.73)                 | 49.4 (41.7-57.2)                   | 0.63 (0.61-0.64)    | 14.1 (11.8-16.8)         |            |            |  |  |
| Puebla           | 3655          | 2003, 2006                                        | 30.3 (25.6-35.5) | 40.7 (37.2-44.4) | 48.2 (45.4-50.9)      | 0.54 (0.50-0.59)                 | 53.3 (46.3-60.2)                   | 0.64 (0.63-0.65)    | 12.6 (10.2-15.5)         | 29.0 (24.4-34.1)                         | 36.9 (33.7-40.2) | 51.9 (48.9-54.9)      | 0.69 (0.64-0.74)                 | 47.8 (43.2-52.5)                   | 0.67 (0.65-0.68)    | 11.8 (9.9-14.1)          |            |            |  |  |
| Juarez           | 3756          | 2003, 2006                                        | 27.0 (23.5-30.8) | 47.2 (44.5-49.8) | 56.6 (54-59.1)        | 0.51 (0.47-0.55)                 | 53.1 (49.1-57)                     | 0.64 (0.63-0.65)    | 11.4 (9.7-13.3)          | 21.3 (18.9-24.0)                         | 42 (39.1-44.9)   | 53.5 (51.5-55.5)      | 0.66 (0.62-0.7)                  | 52.5 (44.7-60.2)                   | 0.63 (0.62-0.64)    | 13.8 (11.9-16)           |            |            |  |  |
| Leon             | 3739          | 2005, 2011                                        | 26.3 (24.1-28.6) | 48.3 (45-51.7)   | 56.6 (54-59.2)        | 0.58 (0.55-0.62)                 | 55.1 (50-60.1)                     | 0.63 (0.62-0.64)    | 11.9 (10.4-13.6)         | 23.0 (21.1-25.0)                         | 35.9 (32.4-39.6) | 52.7 (49.6-55.9)      | 0.69 (0.66-0.71)                 | 49.5 (41.3-57.7)                   | 0.63 (0.61-0.64)    | 12.7 (10.4-15.4)         |            |            |  |  |
| Cuernavaca       | 4076          | 2003, 2006                                        | 24.9 (22.2-27.8) | 39.5 (37.1-41.9) | 52.6 (49.7-55.5)      | 0.55 (0.52-0.59)                 | 48.1 (43.3-53)                     | 0.64 (0.63-0.65)    | 13.3 (11.2-15.7)         | 24.4 (21.9-27.1)                         | 40.7 (37-44.6)   | 55 (51.7-58.2)        | 0.72 (0.7-0.75)                  | 49.4 (41.7-57.2)                   | 0.64 (0.63-0.65)    | 12.4 (10.1-15.1)         |            |            |  |  |
| Durango          | 3674          | 2005, 2011                                        | 24.9 (22.2-27.8) | 40.8 (37.8-43.8) | 50.2 (47.9-52.5)      | 0.66 (0.62-0.70)                 | 51.5 (45.4-57.6)                   | 0.63 (0.62-0.64)    | 11 (9.4-12.8)            | 18.7 (15.5-22.4)                         | 32.9 (29.6-36.4) | 45.3 (42.4-48.2)      | 0.65 (0.63-0.67)                 | 46.7 (41.5-51.9)                   | 0.63 (0.61-0.64)    | 11.9 (9.4-14.9)          |            |            |  |  |
| Chilpancingo     | 3383          | 2005, 2011                                        | 24.6 (21.8-27.7) | 30 (27.9-32.3)   | 42.1 (39.1-45.2)      | 0.67 (0.64-0.69)                 | 45.3 (40.6-50)                     | 0.62 (0.61-0.63)    | 11.9 (10.3-13.7)         | 18.5 (14.7-22.9)                         | 25.2 (23-27.5)   | 44.7 (40.8-48.7)      | 0.74 (0.71-0.78)                 | 48.0 (41.9-54.1)                   | 0.63 (0.61-0.64)    | 14.1 (11.6-17.1)         |            |            |  |  |
| Mexico City      | 3467          | 2003, 2011                                        | 24.3 (21.0-27.9) | 48.8 (46.6-51.1) | 56.4 (54.0-58.7)      | 0.45 (0.41-0.48)                 | 43.2 (36.9-49.6)                   | 0.64 (0.63-0.65)    | 11.9 (9.5-14.7)          | 24.5 (20.7-28.8)                         | 41.4 (36.1-47.0) | 54.5 (49.4-59.4)      | 0.62 (0.56-0.67)                 | 48.5 (43.5-53.7)                   | 0.63 (0.61-0.65)    | 13.3 (9.9-17.5)          |            |            |  |  |
| Veracruz         | 3950          | 2005, 2011                                        | 24.1 (22.2-26.1) | 36.3 (34.3-38.4) | 48 (44.9-51.1)        | 0.59 (0.56-0.61)                 | 46.1 (39.7-52.7)                   | 0.62 (0.61-0.64)    | 10.6 (9.3-12)            | 19.0 (16.6-21.5)                         | 29 (27.4-30.7)   | 45.3 (41.8-48.8)      | 0.66 (0.62-0.71)                 | 49.6 (42.3-56.9)                   | 0.62 (0.61-0.64)    | 10.1 (7.4-13.6)          |            |            |  |  |
| Hermosillo       | 4459          | 2005, 2011                                        | 24.1 (21-27.6)   | 42.1 (39-45.2)   | 55.8 (51.6-59.8)      | 0.67 (0.65-0.69)                 | 53.5 (48.5-58.3)                   | 0.64 (0.63-0.65)    | 11.2 (9.4-13.3)          | 14.7 (12.3-17.5)                         | 29.3 (26.2-32.6) | 45.3 (43.4-47.3)      | 0.67 (0.63-0.7)                  | 45.2 (36.2-54.5)                   | 0.61 (0.59-0.62)    | 12.2 (10.1-14.6)         |            |            |  |  |
| Zacatecas        | 3286          | 2005, 2011                                        | 24.1 (21.2-27.2) | 41.1 (38-44.3)   | 50.2 (47.1-53.2)      | 0.60 (0.57-0.62)                 | 52.9 (47.4-58.4)                   | 0.62 (0.61-0.63)    | 12.1 (9.8-14.8)          | 20.0 (17.4-23.0)                         | 36.2 (33.7-38.9) | 50.1 (47.3-53)        | 0.69 (0.65-0.73)                 | 59.1 (53-64.9)                     | 0.63 (0.61-0.64)    | 10.3 (8.4-12.7)          |            |            |  |  |
| Merida           | 3462          | 2005, 2011                                        | 23.4 (18.6-29)   | 36 (32.8-39.3)   | 50.1 (46.9-53.2)      | 0.62 (0.59-0.66)                 | 49.9 (43.7-56)                     | 0.63 (0.62-0.64)    | 11.3 (9.4-13.4)          | 19.1 (14.5-24.7)                         | 27 (23.8-30.5)   | 47.4 (42.8-52.1)      | 0.69 (0.65-0.73)                 | 44.9 (35.3-55)                     | 0.63 (0.61-0.64)    | 13.7 (9.8-18.9)          |            |            |  |  |
| Guadalajara      | 4152          | 2003, 2006                                        | 23.2 (19.5-27.3) | 46.2 (43.3-49.1) | 59.2 (56.1-62.2)      | 0.69 (0.64-0.73)                 | 47.8 (41.4-54.4)                   | 0.63 (0.63-0.64)    | 10.3 (8.6-12.2)          | 22.3 (19.4-25.6)                         | 45.5 (43.4-47.6) | 59.1 (56.3-61.8)      | 0.7 (0.67-0.73)                  | 50.9 (42.2-59.6)                   | 0.65 (0.64-0.67)    | 10.5 (9-12.2)            |            |            |  |  |
| Monterrey        | 3317          | 2000, 2011                                        | 22.6 (20.1-25.2) | 46.3 (43.3-49.3) | 57.7 (55.1-60.3)      | 0.64 (0.59-0.70)                 | 42.4 (38.0-46.9)                   | 0.69 (0.67-0.7)     | 12.1 (10.2-14.2)         | 17.7 (13.6-22.7)                         | 37.8 (32.5-43.4) | 50 (45.1-54.9)        | 0.66 (0.62-0.69)                 | 47.5 (37.2-58.1)                   | 0.61 (0.59-0.63)    | 10.1 (7.4-13.7)          |            |            |  |  |
| Chetumal         | 2871          | 2003, 2006                                        | 22.1 (18.8-25.9) | 33.3 (31-35.8)   | 46.3 (43.1-49.5)      | 0.60 (0.56-0.65)                 | 48.1 (41.2-55.1)                   | 0.63 (0.62-0.64)    | 10.8 (8.9-13.1)          | 16.6 (14.0-19.5)                         | 27.8 (25.1-30.7) | 43.6 (40.2-47)        | 0.72 (0.69-0.76)                 | 51.1 (44.4-57.7)                   | 0.62 (0.61-0.63)    | 10.7 (9-12.6)            |            |            |  |  |
| Tapachula        | 3845          | 2005, 2011                                        | 19.8 (17.8-22)   | 32 (30.1-34)     | 49.5 (46.7-52.2)      | 0.66 (0.64-0.68)                 | 53.7 (48-59.3)                     | 0.63 (0.62-0.64)    | 8.2 (6.7-10)             | 17.6 (14.1-21.8)                         | 30.2 (27-33.6)   | 49.6 (46.2-53.1)      | 0.70 (0.66-0.73)                 | 58.5 (52.8-63.9)                   | 0.63 (0.61-0.64)    | 11.3 (8.9-14.1)          |            |            |  |  |
| Nuevo Laredo     | 2830          | 2003, 2006                                        | 19.5 (16.8-22.6) | 40.3 (37.3-43.3) | 49.2 (45.6-52.8)      | 0.57 (0.54-0.59)                 | 48 (41-55)                         | 0.64 (0.63-0.65)    | 8.9 (7.2-11)             | 16.0 (13.9-18.4)                         | 40.9 (37.8-44.2) | 54.9 (51.5-58.2)      | 0.68 (0.64-0.72)                 | 59.3 (52.4-65.8)                   | 0.66 (0.65-0.67)    | 9.2 (7.3-11.5)           |            |            |  |  |
| Oaxaca           | 4052          | 2003, 2011                                        | 18.6 (16.2-21.3) | 22.3 (20.1-24.8) | 39.6 (36.4-42.9)      | 0.57 (0.53-0.60)                 | 44 (35.7-52.7)                     | 0.62 (0.60-0.63)    | 8.7 (7.4-10.3)           | 17.8 (14.6-21.5)                         | 18.6 (16.5-20.9) | 37.8 (35.2-40.4)      | 0.71 (0.66-0.76)                 | 40.0 (34.9-45.3)                   | 0.63 (0.62-0.64)    | 8.9 (7.5-10.7)           |            |            |  |  |
| Tapachula        | 4247          | 2003, 2006                                        | 18.3 (15.4-21.5) | 27.8 (24.9-31)   | 38 (35.4-40.7)        | 0.67 (0.65-0.69)                 | 40.5 (32.2-49.3)                   | 0.62 (0.61-0.63)    | 11.1 (9.6-12.8)          | 19.8 (16.7-23.3)                         | 26.7 (22.9-30.9) | 41.5 (38.7-44.3)      | 0.72 (0.69-0.74)                 | 37.8 (30.8-45.4)                   | 0.6 (0.59-0.61)     | 14.9 (11.9-18.5)         |            |            |  |  |
| Tijuana          | 3785          | 2003, 2006                                        | 16.9 (14.9-19.1) | 34.9 (32.6-37.3) | 47.9 (45.7-50.1)      | 0.53 (0.50-0.56)                 | 38.1 (31.2-45.5)                   | 0.63 (0.62-0.64)    | 10.1 (8.8-11.5)          | 15.9 (13.8-18.2)                         | 33.5 (31.4-35.8) | 49.8 (47.3-52.3)      | 0.72 (0.68-0.75)                 | 48.3 (42-54.5)                     | 0.63 (0.62-0.64)    | 9.7 (8-11.7)             |            |            |  |  |
| Culiacan         | 3722          | 2005, 2011                                        | 15.5 (12.5-19)   | 34.6 (32-37.4)   | 46.7 (43.4-50)        | 0.64 (0.61-0.67)                 | 48 (39.3-56.8)                     | 0.62 (0.61-0.63)    | 11.2 (9-13.9)            | 10.3 (8.3-12.8)                          | 25.7 (23.4-28.2) | 38.4 (36.5-40.3)      | 0.68 (0.65-0.71)                 | 38.9 (30.3-48.4)                   | 0.59 (0.57-0.6)     | 10 (7.9-12.5)            |            |            |  |  |
| <b>PERU</b>      |               |                                                   |                  |                  |                       |                                  |                                    |                     |                          |                                          |                  |                       |                                  |                                    |                     |                          |            |            |  |  |
| Total            | 14192         |                                                   | 24.0 (21.1-27.3) | 30.4 (27.6-33.3) | 44.2 (41.3-47.1)      | 0.49 (0.45-0.53)                 | 29.3 (25.8-33.1)                   | 0.65 (0.64-0.66)    | 9.5 (8.5-10.6)           | 21.8 (18.0-26.2)                         | 23.9 (20.8-27.3) | 49.2 (46.1-52.2)      | 0.57 (0.53-0.61)                 | 28.5 (24.6-32.7)                   | 0.53 (0.51-0.54)    | 10.0 (8.0-12.4)          |            |            |  |  |
| Huancayo         | 3383          | 2000, 2007                                        | 21.7 (18.0-26.0) | 22.8 (20.1-25.8) | 34.4 (30.6-38.4)      | 0.52 (0.47-0.56)                 | 26.0 (20.4-32.6)                   | 0.64 (0.62-0.65)    | 11.7 (10.0-13.5)         | 20.9 (17.2-25.1)                         | 19 (16.6-21.6)   | 42.3 (39.1-45.6)      | 0.56 (0.53-0.59)                 | 39.8 (34.1-45.7)                   | 0.53 (0.51-0.55)    | 12.2 (10.5-14.3)         |            |            |  |  |
| Ica              | 4393          | 2002, 2007                                        | 18.5 (15.9-21.4) | 28.9 (26.6-31.2) | 40.0 (36.9-43.2)      | 0.56 (0.53-0.58)                 | 24.0 (20.5-27.9)                   | 0.62 (0.61-0.63)    | 9.3 (7.9-11.0)           | 20.1 (16.8-23.8)                         | 24.8 (22.6-27.1) | 46.1 (43-49.2)        | 0.59 (0.56-0.62)                 | 36.7 (30.4-43.6)                   | 0.52 (0.51-0.53)    | 11.8 (9.4-14.7)          |            |            |  |  |
| Lima             | 3294          | 2000, 2007                                        | 24.6 (21.1-28.4) | 31.1 (27.9-34.6) | 45.2 (41.7-48.6)      | 0.47 (0.42-0.52)                 | 30.2 (26.1-34.7)                   | 0.65 (0.64-0.66)    | 9.3 (8.2-10.6)           | 22.4 (18.0-27.5)                         | 24.5 (20.9-28.6) | 50.2 (46.6-53.8)      | 0.56 (0.52-0.61)                 | 27.5 (23.2-32.4)                   | 0.53 (0.51-0.55)    | 9.8 (7.5-12.7)           |            |            |  |  |
| Trujillo         | 3122          | 2000, 2007                                        | 22.5 (19.8-25.4) | 28.1 (25.1-31.2) | 42.2 (38.4-46.2)      | 0.61 (0.56-0.65)                 | 23.4 (16.0-32.7)                   | 0.65 (0.63-0.67)    | 10.0 (7.3-13.4)          | 16.8 (1                                  |                  |                       |                                  |                                    |                     |                          |            |            |  |  |

**Supplement Figure S1.** Forest plot ENFORCE-MEDIA AND ADVERTISING. Means of exposure to tobacco media and advertising and weighted mean difference of later:earlier period (WMD, with 95% confidence intervals), by country and city (sorted by WMD).

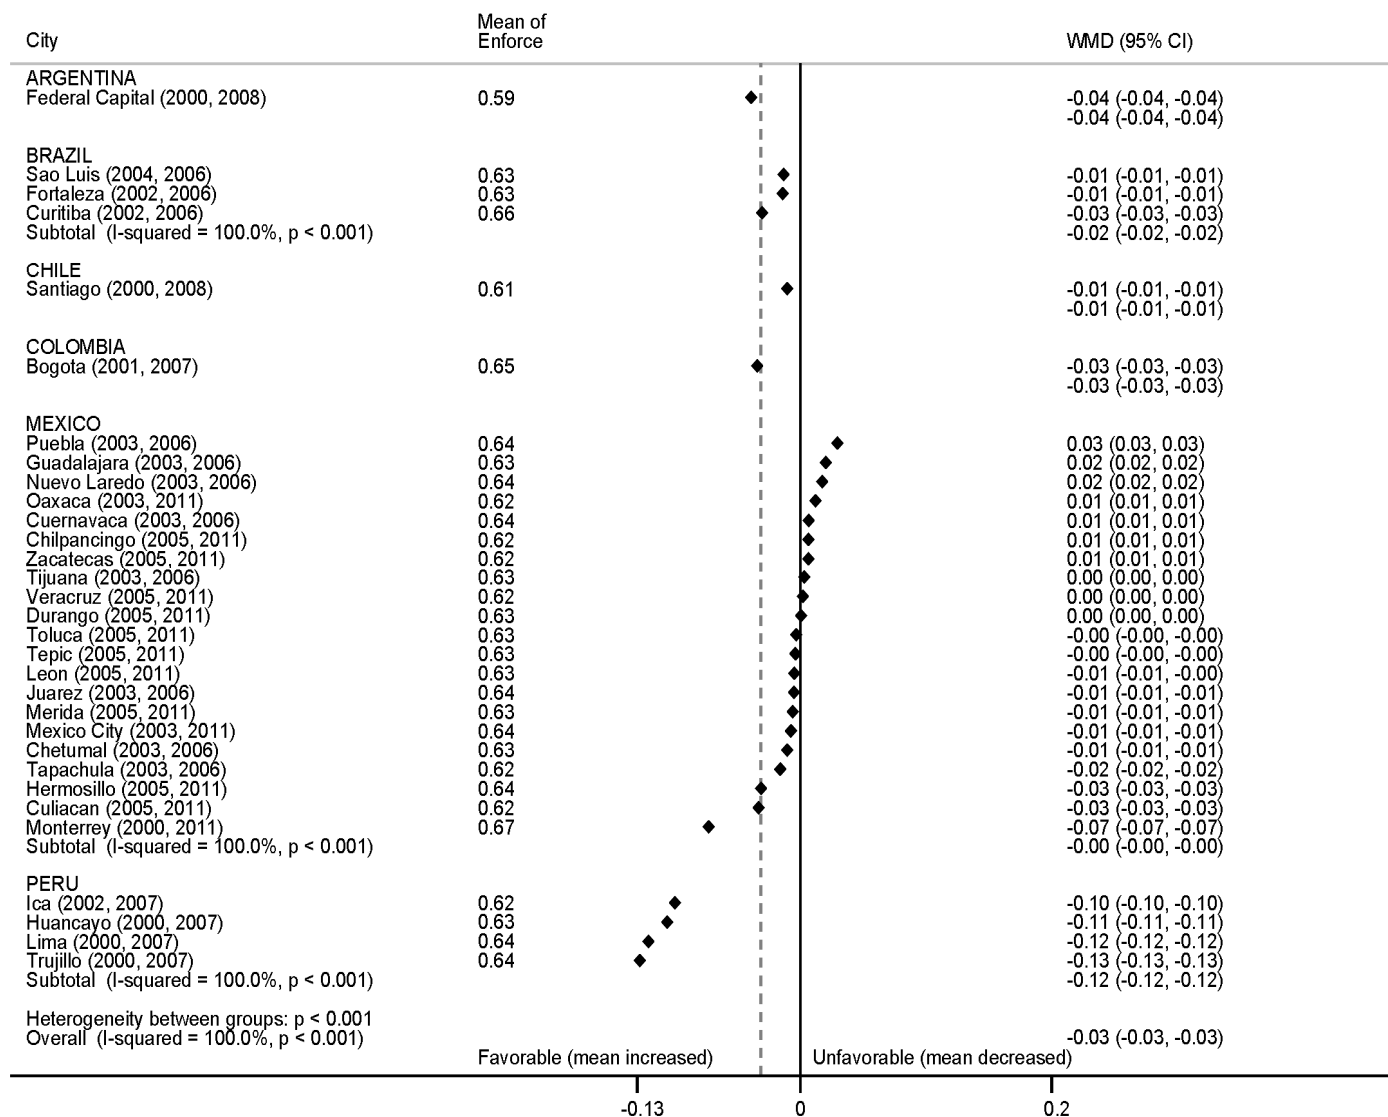

**Supplement Figure S2.** Forest plot ENFORCE-FREE CIGARETTE. Prevalence of offered free cigarette and ratio of later:earlier period prevalence (PR, with 95% confidence intervals), by country and city (sorted by PR).

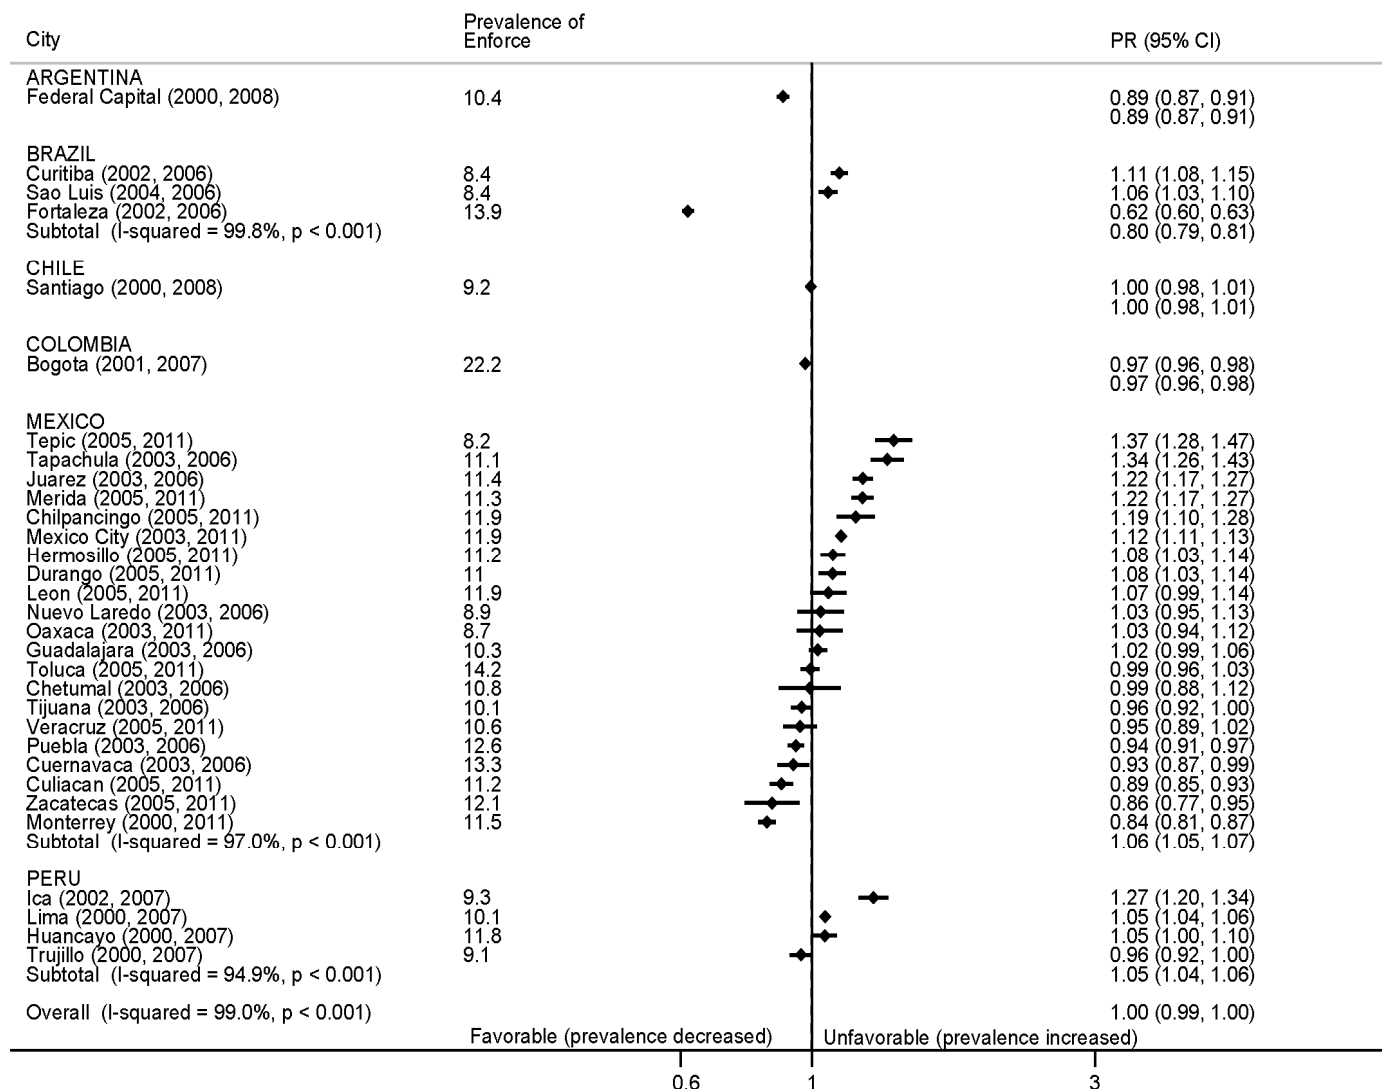

Supplement: ijerph-17-07423-s001.pdf [file ijerph-17-07423-s001.pdf]
